# Supplementary material
Source: publisher figshare collection journal article supplement (https://acs.figshare.com/ndownloader/files/9994534)
Supplement: Supplementary file 1 [file 9994534]

## **Supplementary material**

### **1. Material and methods**

#### **1.1 Fabrication of SPC chip**

The mold was prepared using two layers soft lithography technique. The patterns of channels and chambers of SPC chip were designed by CorelDRAW X8 and printed on two transparency films as masks, respectively. First, negative photoresist (#SU-8 3050, MicroChem, USA) was coated onto a clean, dry silicon wafer at a speed of 2700 rpm for 30 s using spin-coater (Chemat, USA) as the first layer. After soft baking at 65 °C for 1 min and then 95 °C for 15 min, the channels pattern was exposed by the one-side stepper (Nanguang Vacuum Technology, China) under the mask. The exposed wafer was baked at 65 °C for 1 min and at 95 °C for 5 min. Then, the fabrication of second layer was similar to the first layer. SU-8 3050 was coated onto the wafer at a speed of 1300 rpm for 30 s, and then the wafer was soft baked (65 °C for 1 min and then 95 °C for 40 min). Before exposure, the mask of chambers pattern must be aligned with the first layer. After exposing for 25 s, the wafer was post exposure baked as mentioned. Finally, the treated wafer was developed in SU-8 Developer (MicroChem, USA) until the mold was defined. In order to make the mold have better mechanical properties, baking at 300 °C for 20 min was conducted. Then, the mold was ready to replicate PDMS

chips.

Before each use of the mold, it was treated by trimethylchlorosilane (#104814, Aladdin, China) to prevent PDMS adhesion. First, a thin PDMS layer containing component A and B (#RTV 615, Momentive, USA), at a ratio of 5: 1, was spun on the mold at 1500 rpm for 30s, which formed a reaction layer. To avoid solution evaporation in the reaction, after baking at 85 °C for 5 min, fluorinated polymers Novec EGC-1720 (3M, USA) was spun onto the reaction layer at 1000rpm for 30 s followed another 85 °C baking for 5 min. And then, a PDMS mixture (A: B= 10: 1) was poured onto the chip. Through 85 °C baking for 90 min, the solidified supporting layer generated. The multilayer chip was peeled off from the mold to punch inlet and outlet. Finally, the PDMS device was bonded on a coverslip pre-treated by oxygen plasma followed another 85 °C baking for 90 min. The top of chip was covered by transparent adhesive tape for better degasification. Overall, the SPC microfluidic chip was ready-to-use.

## 1.2 Off-chip conventional LAMP and PCR reaction

The commercial LAMP assay kit (# 310005, Loopamp, Japan) and PCR kit (# B532081, Sangon, China) were applied to the reactions. The primer sets and reaction condition of conventional LAMP were the same as the MD-LAMP. The F3 and B3 were used as primers of the PCR

reaction and 1.5, 2.5, 3.5, 4.5 mmol/ L MgCl<sub>2</sub> were used to optimize the condition. The PCR amplification procedure was as follows: First, started with a 4 min pre-duration step at 94 °C. And then, 35 thermal cycles of at 94 °C for 30 s, 55 °C for 30 s and 72 °C for 30 s were run. Finally, post-extended for 10 min at 72 °C. Nine replicates of each concentrations of VP template were tested. The result of the conventional LAMP reaction were read by adding Fluorescent Detection Reagent (# 310007, Loopamp, Japan) and PCR reaction were read by 2% agarose gel electrophoresis marked by SYBR Green I.

## 2. Supplemented tables and figures

### 2.1 Supplemented tables

**Table S-1.** List of used primers and the cloned gene sequence.

| Description                                                                         | Sequence (5'-3')                                                                                                                                                                                                                                                     |
|-------------------------------------------------------------------------------------|----------------------------------------------------------------------------------------------------------------------------------------------------------------------------------------------------------------------------------------------------------------------|
| The cloned part<br>sequence of<br><i>Vibrio parahaemolyticus</i><br><i>tlh</i> gene | CCAGCTACTCGAAAGATGATCCAGCGACCGATTGGGAATGGGCA<br>AAAAACGAAGATGGTAGCTACTTCACCATTGACGGCTACTGGTGG<br>AGCTCCGTTTTCATTTAAAAACATGTTCTACACCAACACGTCGCAA<br>ACGTTATCCGTCAGCGTTGTGAAGCAACATTAGATTTGGCGAACG<br>AGAACGCAGACATTACGTTCTTCGCCGCTGACAATCGCTTCTCAT<br>ACAACCACACGATCT |
| F3- <i>tlh</i>                                                                      | AGCTACTCGAAAGATGATCC                                                                                                                                                                                                                                                 |
| B3- <i>tlh</i>                                                                      | GGTTGTATGAGAAGCGATTG                                                                                                                                                                                                                                                 |
| LF- <i>tlh</i>                                                                      | ACCAGTAGCCGTCAATG                                                                                                                                                                                                                                                    |
| LB- <i>tlh</i>                                                                      | TTAGATTTGGCGAACGAGA                                                                                                                                                                                                                                                  |
| FIP- <i>tlh</i>                                                                     | ATGTTTTTAAATGAAACGGAGCTCCGGCAAAAAACGAAGATGGT                                                                                                                                                                                                                         |
| BIP- <i>tlh</i>                                                                     | ACGTCGCAAAACGTTATCCGGCGAAGAACGTAATGTCTG                                                                                                                                                                                                                              |

**Table S-2.** The advantages of the CDM-LAMP compared with the conventional methods.

|                           | <b>CMD-LAMP</b>                         | <b>Conventional LAMP</b>                                            | <b>Conventional PCR</b>                                                                       |
|---------------------------|-----------------------------------------|---------------------------------------------------------------------|-----------------------------------------------------------------------------------------------|
| <b>Pre-enrichment</b>     | No                                      | Yes                                                                 | Yes                                                                                           |
| <b>Detection Time</b>     | 2 hours                                 | > 10 hours                                                          | > 12 hours                                                                                    |
| <b>Limit of detection</b> | 1×10 <sup>3</sup> CFU/ mL               | ~10 <sup>5</sup> CFU/ mL                                            | ~ 10 <sup>5</sup> CFU/ mL                                                                     |
| <b>Quantification</b>     | Yes                                     | No                                                                  | No                                                                                            |
| <b>Key instrument</b>     | Cheap heating plate<br>(Total < \$ 100) | Culture-related device;<br>Cheap heating plate<br>(Total > \$ 9000) | Culture-related device;<br>Thermal cycler;<br>Electrophoresis apparatus<br>(Total > \$ 12000) |
| <b>Readout device</b>     | Handheld light source                   | Handheld light source                                               | Gel Imaging System                                                                            |
| <b>On-site operation</b>  | Easily                                  | Normally                                                            | Difficultly                                                                                   |

**Table S-3.** The comparison among the CDM-LAMP and the other LAMP methods for VP detection.

| <b>No.</b> | <b>Year</b> | <b>LOD* (CFU/ mL(g))</b> | <b>Target gene</b> | <b>Pre-enrichment</b> | <b>Quantification</b> | <b>Ref.</b> |
|------------|-------------|--------------------------|--------------------|-----------------------|-----------------------|-------------|
| 1          |             | 1000                     | <i>tlh</i>         | No                    | Yes                   | This study  |
| 2          | 2017        | 10000                    | <i>toxR</i>        | No                    | No                    | 1           |
| 3          | 2016        | 18000                    | <i>ompA</i>        | No                    | No                    | 2           |
| 4          | 2016        | 100**                    | <i>pirA</i>        | No                    | No                    | 3           |
| 5          | 2016        | 9200                     | <i>toxR</i>        | No                    | No                    | 4           |
| 6          | 2014        | 1900                     | <i>tlh</i>         | No                    | No                    | 5           |
| 7          | 2013        | 1000**                   | <i>tlh</i>         | No                    | No                    | 6           |
| 8          | 2011        | 1800                     | <i>tlh</i>         | No                    | No                    | 7           |
| 9          | 2010        | 110000                   | <i>toxR</i>        | No                    | No                    | 8           |
| 10         | 2010        | 400                      | <i>tdh</i>         | No                    | No                    | 9           |
| 11         | 2010        | 10650                    | <i>trh1</i>        | No                    | No                    | 9           |
| 12         | 2010        | 2500                     | <i>trh2</i>        | No                    | No                    | 9           |
| 13         | 2008        | 530                      | <i>tlh</i>         | No                    | No                    | 10          |
| 14         | 2015        | < 1                      | <i>tdh</i>         | Yes                   | Yes                   | 11          |
| 15         | 2015        | 2                        | <i>tlh/ldh</i>     | Yes                   | No                    | 12          |
| 16         | 2014        | < 1                      | <i>tdh</i>         | Yes                   | Yes                   | 13          |
| 17         | 2014        | 0.19                     | <i>tlh</i>         | Yes                   | No                    | 5           |
| 18         | 2012        | < 1                      | <i>tdh</i>         | Yes                   | No                    | 14          |
| 19         | 2011        | 1.3                      | <i>rpoD</i>        | Yes                   | Yes                   | 15          |

\* LOD of contaminated samples.

\*\* LOD of pure culture samples (LOD of contaminated samples wasn't shown).

## 2.2 Supplemented figures

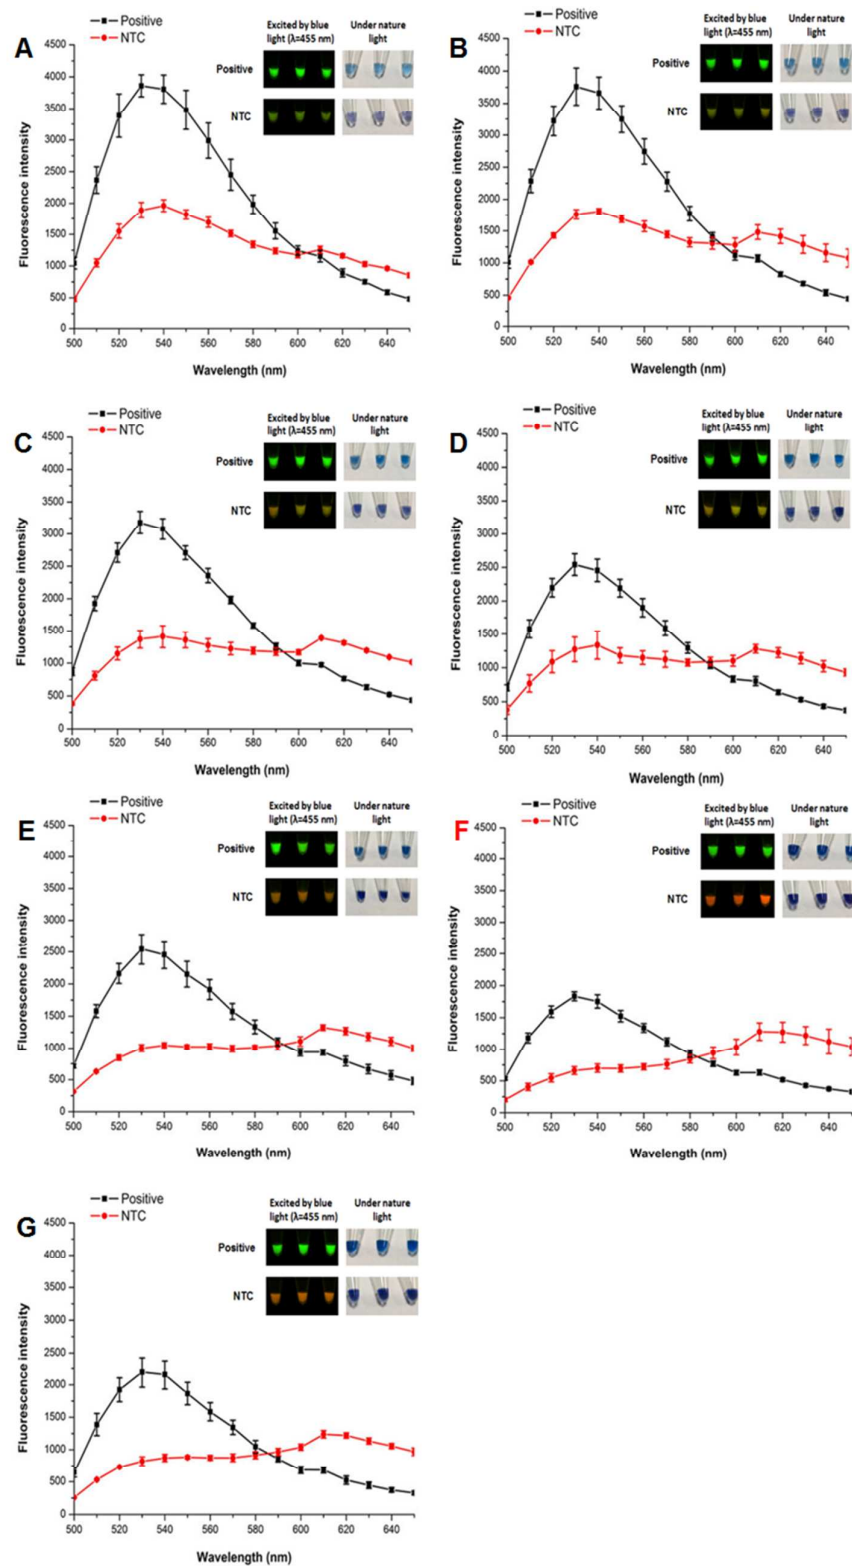

**Figure S-1.** Investigation on the optimal concentration of HNB for MD-LAMP according to color and fluorescence changes: (A) 100  $\mu$ M HNB; (B) 150  $\mu$ M HNB; (C) 200  $\mu$ M HNB; (D) 250  $\mu$ M HNB; (E) 300  $\mu$ M HNB; (F) 350  $\mu$ M HNB; (G) 400  $\mu$ M HNB; Positives, three replicate tests of VP template ( $1 \times 10^7$  CFU/ mL). NTC, three replicate tests of nuclease-free water. Error bars represented the standard deviation value of each test. At the top-right, the images were captured under the blue light ( $\lambda = 455$  nm) and the nature light.

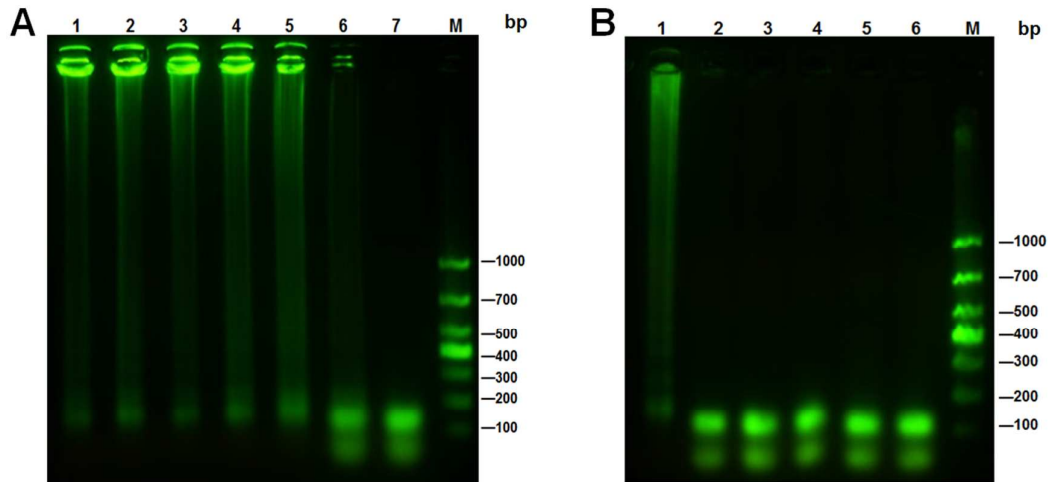

**Figure S-2.** 2% agarose gel electrophoresis of the MD-LAMP products.

(A) Electrophoresis result of the products of gradient VP template concentrations. 1,  $10^8$  CFU/ mL; 2,  $10^7$  CFU/ mL; 3,  $10^6$  CFU/ mL; 4,  $10^5$  CFU/ mL; 5,  $10^4$  CFU/ mL; 6,  $10^3$  CFU/ mL; 7, nuclear-free water; M, DNA marker. (B) Electrophoresis result of the products of different bacteria. 1, *Vibrio parahaemolyticus*; 2, *Salmonella typhimurium*; 3, *Shigella flexneri*; 4, *Listeria monocytogenes*; 5, *Staphylococcus aureus*; 6, nuclear-free water; M, DNA marker.

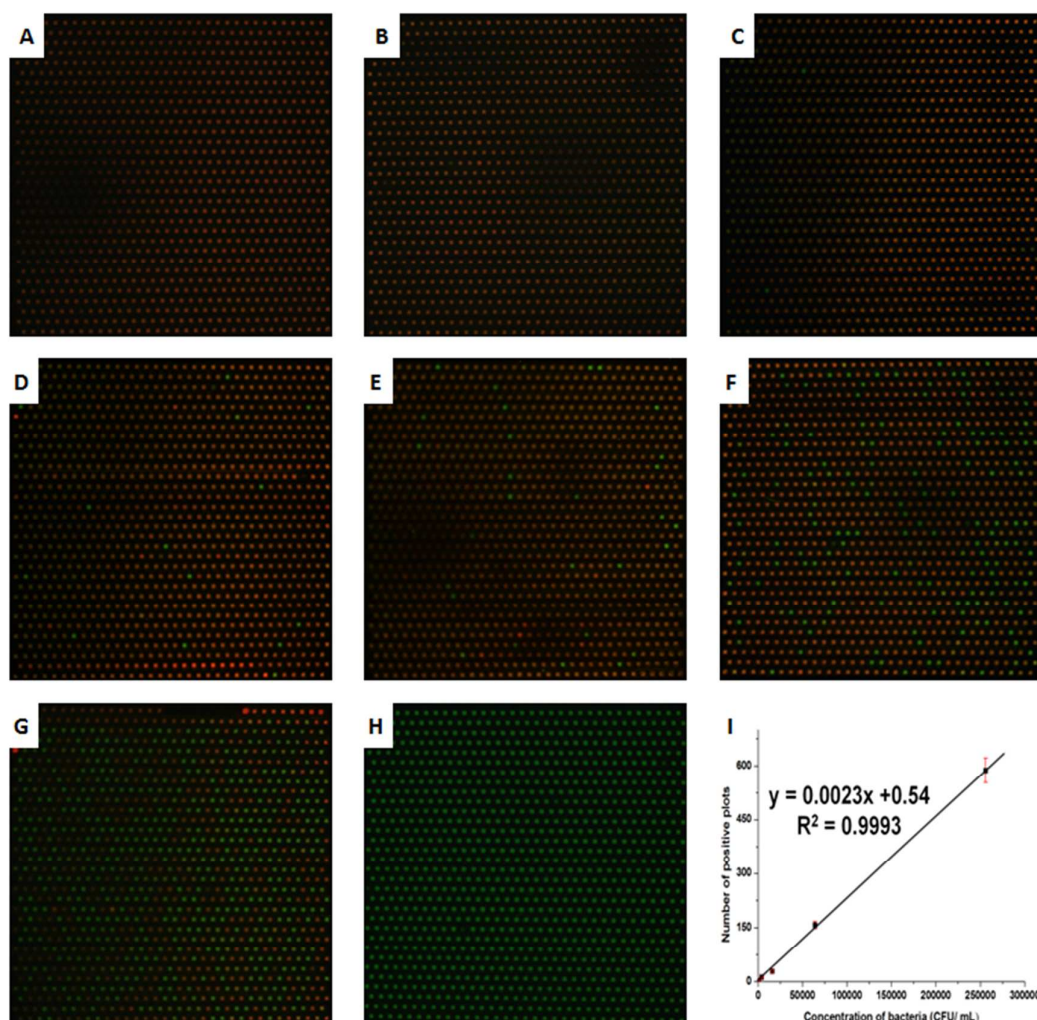

**Fig. S-3.** The CMD-LAMP reactions with different concentrations of VP in food contaminated sample: (A) 0 CFU/mL; (B)  $2.5 \times 10^2$  CFU/mL; (C)  $1.0 \times 10^3$  CFU/mL; (D)  $4.0 \times 10^3$  CFU/mL; (E)  $1.6 \times 10^4$  CFU/mL; (F)  $6.4 \times 10^4$  CFU/mL; (G)  $2.56 \times 10^5$  CFU/mL; (H)  $1.024 \times 10^6$  CFU/mL; (I) The linear relationship between number of positive plots and bacterial concentrations in food contaminated sample. Error bars represented the standard deviation value of each test with three replicates.



**Isolation-1 of  
*Vibrio parahaemolyticus***

**Plate count method**

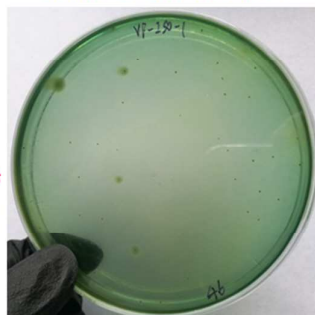

Colony forming units  
(1000 fold dilution)

$47.67 \pm 4.73$

**CMD-LAMP method**

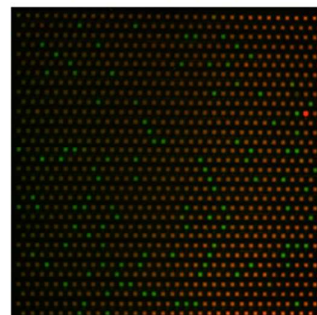

Positive signal  
plots

$104.00 \pm 9.64$

**Isolation-2 of  
*Vibrio parahaemolyticus***

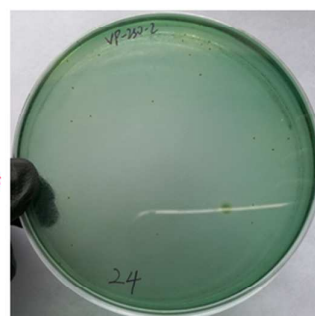

Colony forming units  
(1000 fold dilution)

$23.00 \pm 2.65$

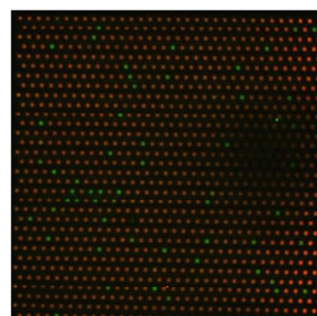

Positive signal  
plots

$53.00 \pm 3.61$

**Plate count method**

**CMD-LAMP method**

**Isolation-3 of  
*Vibrio parahaemolyticus***

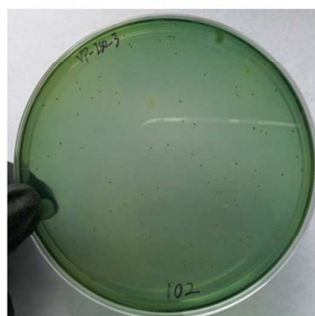

Colony forming units  
(1000 fold dilution)

$102.33 \pm 5.51$

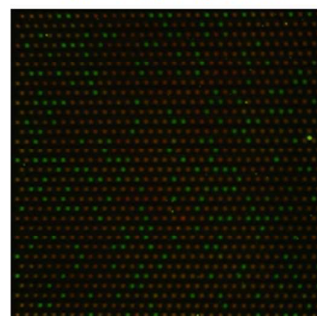

Positive signal  
plots

$220.33 \pm 8.50$

**Isolation-4 of  
*Vibrio parahaemolyticus***

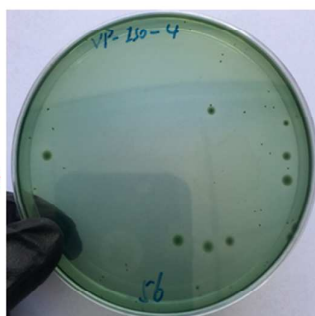

Colony forming units  
(1000 fold dilution)

$57.33 \pm 7.09$

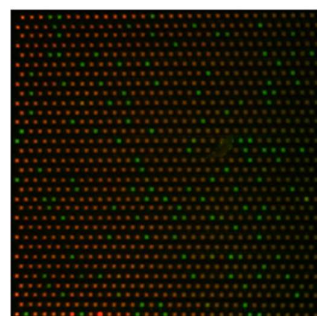

Positive signal  
plots

$127.00 \pm 3.61$

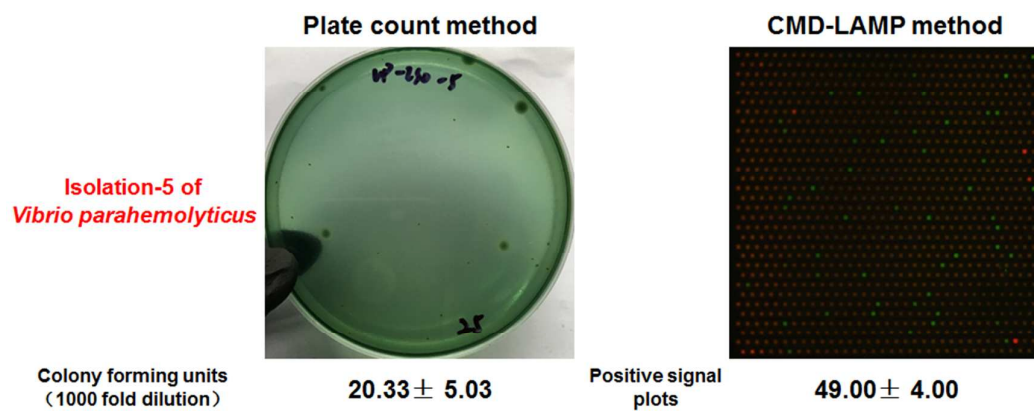

**Figure S-4.** Results for isolation strains of VP in food contaminated samples measured by plate count method (left) and CMD-LAMP method (right).

## References:

1. Park, B. H.; Oh, S. J.; Jung, J. H.; Choi, G.; Seo, J. H.; Kim, D. H.; Lee, E. Y.; Seo, T. S., An integrated rotary microfluidic system with DNA extraction, loop-mediated isothermal amplification, and lateral flow strip based detection for point-of-care pathogen diagnostics. *Biosensors & bioelectronics* **2017**, *91*, 334-340.
2. Zhou, S.; Gao, Z. X.; Zhang, M. Development of a quadruplex loop-mediated isothermal amplification assay for field detection of four *Vibrio* species associated with fish disease. *SpringerPlus* **2016**, *5*, 1104.
3. Arunrut N.; Kampeera J.; Sirithammajak S. Sensitive visual detection of AHPND bacteria using Loop-Mediated Isothermal Amplification combined with DNA-functionalized gold nanoparticles as probes. *PloS One* **2016**, *11*, e0151769.
4. Wang Y.; Li D.; Wang Y. Rapid and sensitive detection of *Vibrio parahaemolyticus* and *Vibrio vulnificus* by multiple endonuclease restriction Real-Time Loop-Mediated Isothermal Amplification technique. *Molecules* **2016**, *21*, E111.
5. Zeng, J.; Wei, H.; Zhang, L.; Liu, X.; Zhang, H.; Cheng, J.; Ma, D.; Zhang, X.; Fu, P.; Liu, L., Rapid detection of *Vibrio parahaemolyticus* in raw oysters using immunomagnetic separation combined with loop-mediated isothermal amplification. *International journal of food microbiology* **2014**, *174*, 123-8.
6. Wang L.; Shi L.; Su J. Detection of *Vibrio parahaemolyticus* in food samples using in situ loop-mediated isothermal amplification method. *Gene*, **2013**, *515*, 421-5.
7. Prompamorn P.; Sithigorngul P.; Rukpratanporn S. The development of loop-mediated isothermal amplification combined with lateral flow dipstick for

detection of *Vibrio parahaemolyticus*. *Lett. Appl. Microbiol.* **2011**, 52, 344-351.

8. Chen S.; Ge B. Development of a *toxR*-based loop-mediated isothermal amplification assay for detecting *Vibrio parahaemolyticus*. *BMC Microbiol.* **2010**, 10, 41.

9. Yamazaki, W.; Kumeda, Y.; Misawa, N.; Nakaguchi, Y.; Nishibuchi, M., Development of a loop-mediated isothermal amplification assay for sensitive and rapid detection of the *tdh* and *trh* genes of *Vibrio parahaemolyticus* and related *Vibrio* species. *Applied and environmental microbiology* **2010**, 76, 820-8.

10. Yamazaki, W.; Ishibashi, M.; Kawahara, R. Development of a loop-mediated isothermal amplification assay for sensitive and rapid detection of *Vibrio parahaemolyticus*. *BMC Microbiol.* **2008**, 8, 163-170.

11. Escalante-Maldonado, O.; Kayali, A. Y.; Yamazaki, W.; Vuddhakul, V.; Nakaguchi, Y.; Nishibuchi, M., Improvement of the quantitation method for the *tdh* (+) *Vibrio parahaemolyticus* in molluscan shellfish based on most-probable-number, immunomagnetic separation, and loop-mediated isothermal amplification. *Frontiers in microbiology* **2015**, 6, 270.

12. Di, H.; Ye, L.; Neogi, S. B. Development and evaluation of a loop-mediated isothermal amplification assay combined with enrichment culture for rapid detection of very low numbers of *Vibrio parahaemolyticus* in seafood samples. *Biol. Pharm. Bull.* **2015**, 38, 82-87.

13. Tanaka N.; Iwade Y.; Yamazaki W. Most-probable-number loop-mediated isothermal amplification-based procedure enhanced with K antigen-specific

immunomagnetic separation for quantifying tdh(+) *Vibrio parahaemolyticus* in molluscan Shellfish. *J. Food Prot.* **2014**, *77*, 1078-85.

14. Yamazaki, M.; Aoki, H.; Iwade, Y.; Matsumoto, M.; Yamada, K.; Yamamoto, H.; Suzuki, M.; Hiramatsu, R.; Minagawa, H., An enrichment medium for increasing a very small number of *vibrio parahaemolyticus* cells to the detection limit of the loop-mediated isothermal amplification (LAMP) assay. *Japanese journal of infectious diseases* **2012**, *65*, 111-6.

15. Nemoto J.; Ikedo M.; Kojima T. Development and evaluation of a loop-mediated isothermal amplification assay for rapid and sensitive detection of *Vibrio parahaemolyticus*. *J. Food Prot.* **2011**, *74*, 1462-7.
